# Supplementary material for: Effect of SGLT2 inhibitor on renal function in patients with type 2 diabetes mellitus: a systematic review and meta-analysis of randomized controlled trials
Source: Springer Nature journal article supplement (doi:10.1007/s11255-019-02112-6), 2019-03-04
Supplement: MOESM1 [file 16524068]

SUPPLEMENTARY DATA

Effect of SGLT2 inhibitor on renal function in patients with type 2 diabetes mellitus：a systematic review and meta-analysis of randomized controlled trials

Chaojie Feng1, Minxiang Wu1, Zhengyue Chen1, Xiongwei Yu1, Zhenyu Nie1, Yu Zhao1, Beiyan Bao1*

1Department of Nephrology, Ningbo Urology and Nephrology Hospital, Ningbo, China

*Corresponding Author. Department of Nephrology, Ningbo Urology and Nephrology Hospital, Ningbo, China. E-mail addresses: baobeiyan2007@sina.com

Supplementary Text 1 - Pre-specified search string

**PubMed Medline**

#1 (((((((((((((SGLT 2 inhibitors[Title/Abstract]) OR SGLT2 inhibitors[Title/Abstract]) OR sodium-glucose co-transport 2 inhibitors[Title/Abstract]) OR sodium glucose co-transport-2 inhibitors[Title/Abstract]) OR sodium-glucose transport inhibitors[Title/Abstract]) OR sergliflozin [Title/Abstract]) OR dapagliflozin[Title/Abstract]) OR forxiga [Title/Abstract])OR remogliflozin[Title/Abstract]) OR ipragliflozin[Title/Abstract]) OR empagliflozin[Title/Abstract]) OR dapagliflozin[Title/Abstract]) OR Canagliflozin [Title/Abstract]))

#2 (((("Diabetes Mellitus, Type 2"[Mesh]) OR ((((((((((((((((((((((((((NIDDM[Title/Abstract]) OR Maturity-Onset Diabetes[Title/Abstract]) OR Diabetes Mellitus, Noninsulin-Dependent[Title/Abstract]) OR Diabetes Mellitus, Adult-Onset[Title/Abstract]) OR Adult-Onset Diabetes Mellitus[Title/Abstract]) OR Diabetes Mellitus, Adult Onset[Title/Abstract]) OR Diabetes Mellitus, Ketosis-Resistant [Title/Abstract]) OR Diabetes Mellitus, Ketosis Resistant[Title/Abstract]) OR Ketosis-Resistant Diabetes Mellitus[Title/Abstract]) OR Diabetes Mellitus, Maturity-Onset[Title/Abstract]) OR Diabetes Mellitus, Maturity Onset[Title/Abstract]) OR Diabetes Mellitus, Non-Insulin Dependent[Title/Abstract]) OR Diabetes Mellitus, Non-Insulin-Dependent[Title/Abstract]) OR Non-Insulin-Dependent Diabetes Mellitus[Title/Abstract]) OR Diabetes Mellitus, Noninsulin Dependent[Title/Abstract]) OR Diabetes Mellitus, Slow-Onset[Title/Abstract]) OR Diabetes Mellitus, Slow Onset[Title/Abstract]) OR Slow-Onset Diabetes Mellitus[Title/Abstract]) OR Diabetes Mellitus, Stable[Title/Abstract]) OR Stable Diabetes Mellitus[Title/Abstract]) OR Diabetes Mellitus, Type II[Title/Abstract]) OR Maturity-Onset Diabetes Mellitus[Title/Abstract]) OR Maturity Onset Diabetes Mellitus [Title/Abstract]) OR MODY[Title/Abstract]) OR Type 2 Diabetes Mellitus[Title/Abstract]) OR Noninsulin-Dependent Diabetes Mellitus[Title/Abstract])))

#3 (((randomized controlled trial [Publication Type]) OR randomized [Title/Abstract]) OR placebo [Title/Abstract])

#1 AND #2 AND #3

**Web of Science**

#1 canagliflozin OR dapagliflozin OR empagliflozin OR ipragliflozin OR remogliflozin OR tofogliflozin OR sergliflozin OR SGLT 2 inhibitors OR sodium-glucose co-transporter 2 inhibitors OR sodium glucose co-transporter-2 inhibitors OR sodium-glucose transporter inhibitors OR SGLT2 inhibitors OR forxiga

#2 Type 2 Diabetes Mellitus OR NIDDM OR Maturity-Onset Diabetes OR Adult-Onset Diabetes Mellitus OR Ketosis-Resistant Diabetes Mellitus OR Non-Insulin-Dependent Diabetes Mellitus OR Slow-Onset Diabetes Mellitus OR Stable Diabetes Mellitus OR Maturity-Onset Diabetes Mellitus OR “Maturity Onset Diabetes Mellitus” OR MODY OR Noninsulin-Dependent Diabetes Mellitus

#3 randomized controlled trial

#4 randomized OR placebo

#1 AND #2 AND Type #3 AND #4

**Cochrane Library**

#1 canagliflozin OR dapagliflozin OR empagliflozin OR ipragliflozin OR remogliflozin OR tofogliflozin OR sergliflozin OR SGLT 2 inhibitors OR sodium-glucose co-transporter 2 inhibitors OR sodium glucose co-transporter-2 inhibitors OR sodium-glucose transporter inhibitors OR SGLT2 inhibitors OR forxiga

#2 Type 2 Diabetes Mellitus OR NIDDM OR Maturity-Onset Diabetes OR Adult-Onset Diabetes Mellitus OR Ketosis-Resistant Diabetes Mellitus OR Non-Insulin-Dependent Diabetes Mellitus OR Slow-Onset Diabetes Mellitus OR Stable Diabetes Mellitus OR Maturity-Onset Diabetes Mellitus OR “Maturity Onset Diabetes Mellitus” OR MODY OR Noninsulin-Dependent Diabetes Mellitus

#3 randomized controlled trial

#4 randomized OR placebo

title-abstract-key #1 AND title-abstract-key #2 AND Publication Type #3 AND title-abstract-key #4

**EMBASE**

title-abstr-key(canagliflozin OR dapagliflozin OR empagliflozin OR ipragliflozin OR remogliflozin OR tofogliflozin OR sergliflozin OR SGLT 2 inhibitors OR sodium-glucose co-transporter 2 inhibitors OR sodium glucose co-transporter-2 inhibitors OR sodium-glucose transporter inhibitors OR SGLT2 inhibitors OR forxiga) AND title-abstr-key(Type 2 Diabetes Mellitus OR NIDDM OR Maturity-Onset Diabetes OR Adult-Onset Diabetes Mellitus OR Ketosis-Resistant Diabetes Mellitus OR Non-Insulin-Dependent Diabetes Mellitus OR Slow-Onset Diabetes Mellitus OR Stable Diabetes Mellitus OR Maturity-Onset Diabetes Mellitus OR “Maturity Onset Diabetes Mellitus” OR MODY OR Noninsulin-Dependent Diabetes Mellitus)and title-abstr-key (randomized controlled trial OR randomized OR placebo )

Supplementary Fig. 1 - Funnel plots of all endpoints for identification of publication bias

eGFR(all)


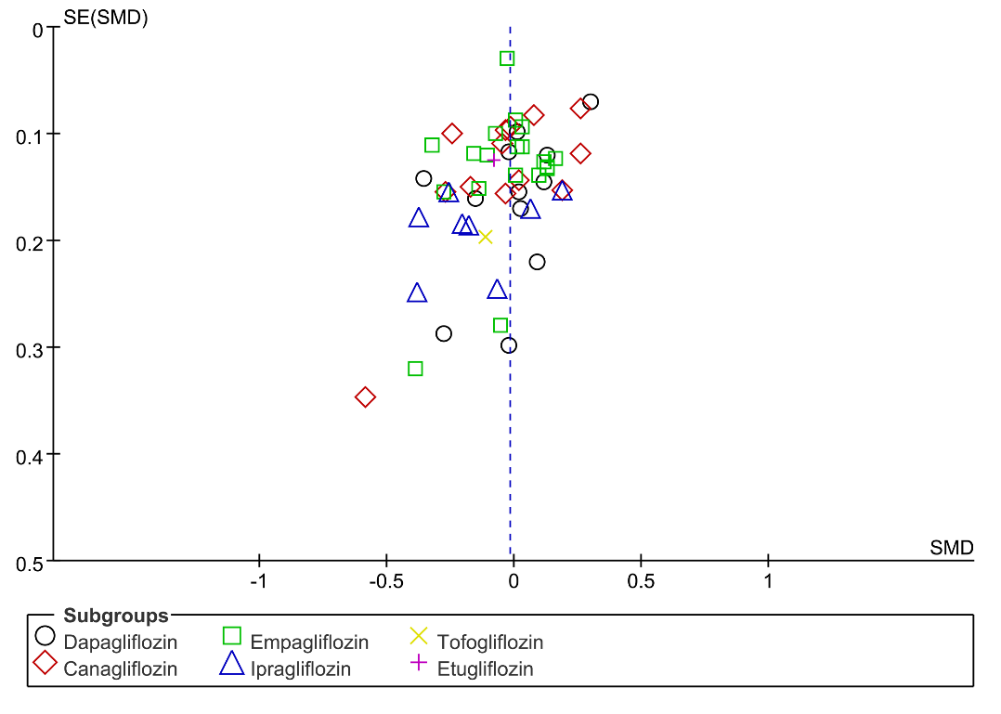


Supplementary Fig. 2 - Funnel plots of all endpoints for identification of publication bias

UACR (all)


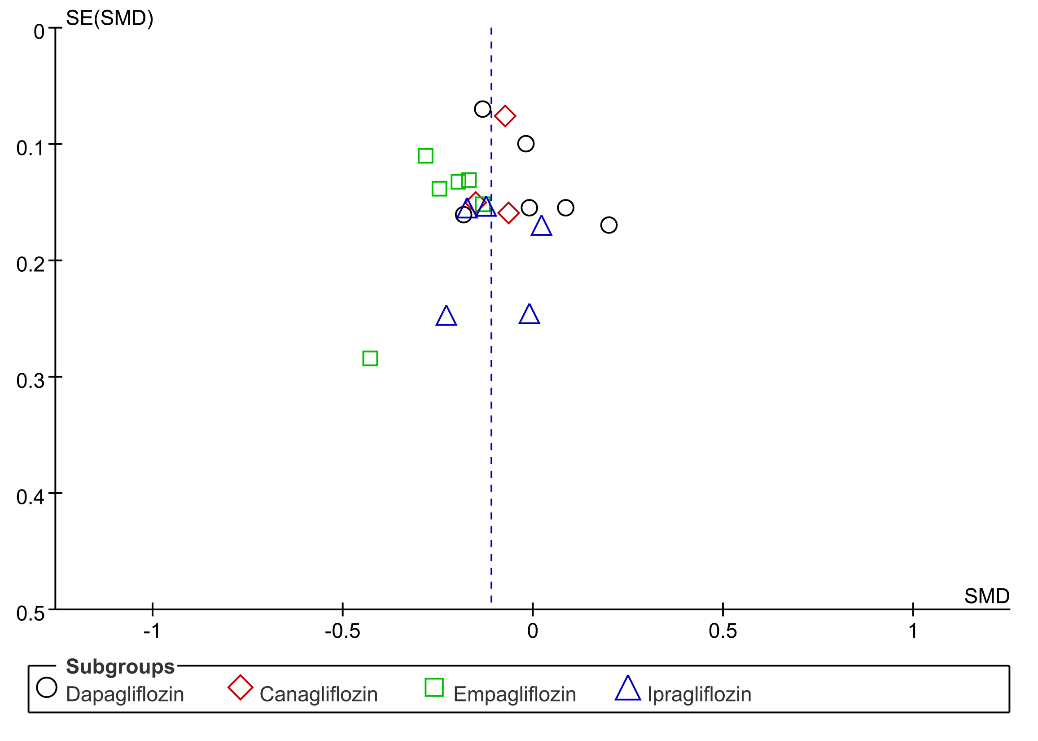


**eGFR, estimated glomerular filtration rate; UACR, urine albumin/creatinine ratio**

Supplementary Table 1 - Publication bias calculated by Egger’s and Begg’s test.

|  | **Egger’s test** | **Begg’s test** |
| --- | --- | --- |
| **eGFR(all)** | 0.085 | 0.018 |
| **UACR (all)** | 0.953 | 0.581 |

**eGFR, estimated glomerular filtration rate; UACR, urine albumin/creatinine ratio**

Supplementary Fig. 3**–**The methodological quality of included studies (risk of bias graph)

**
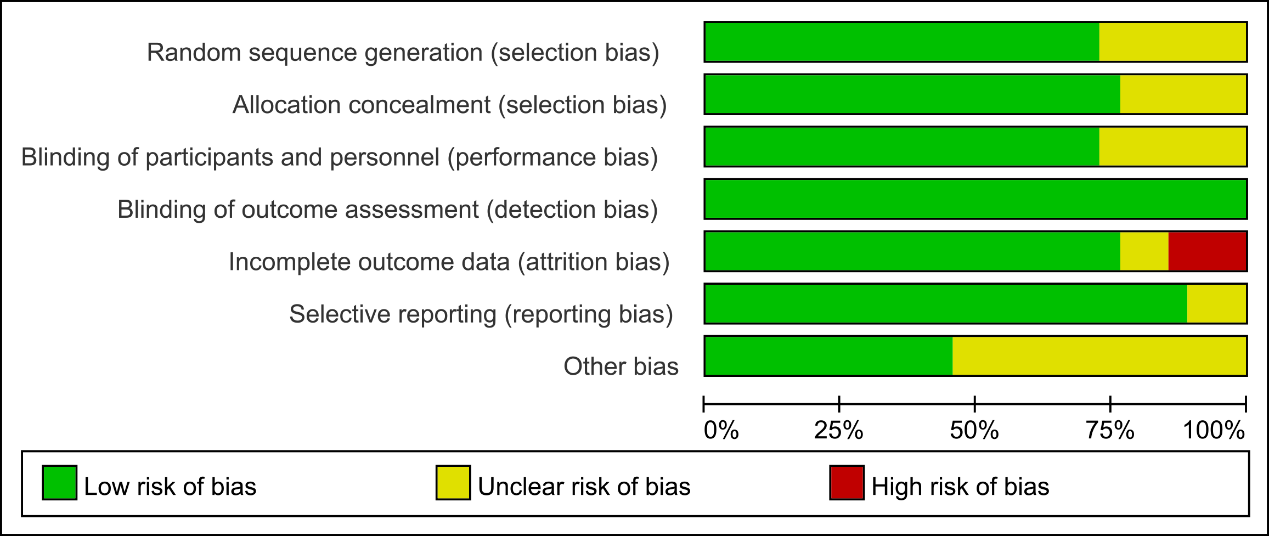
**


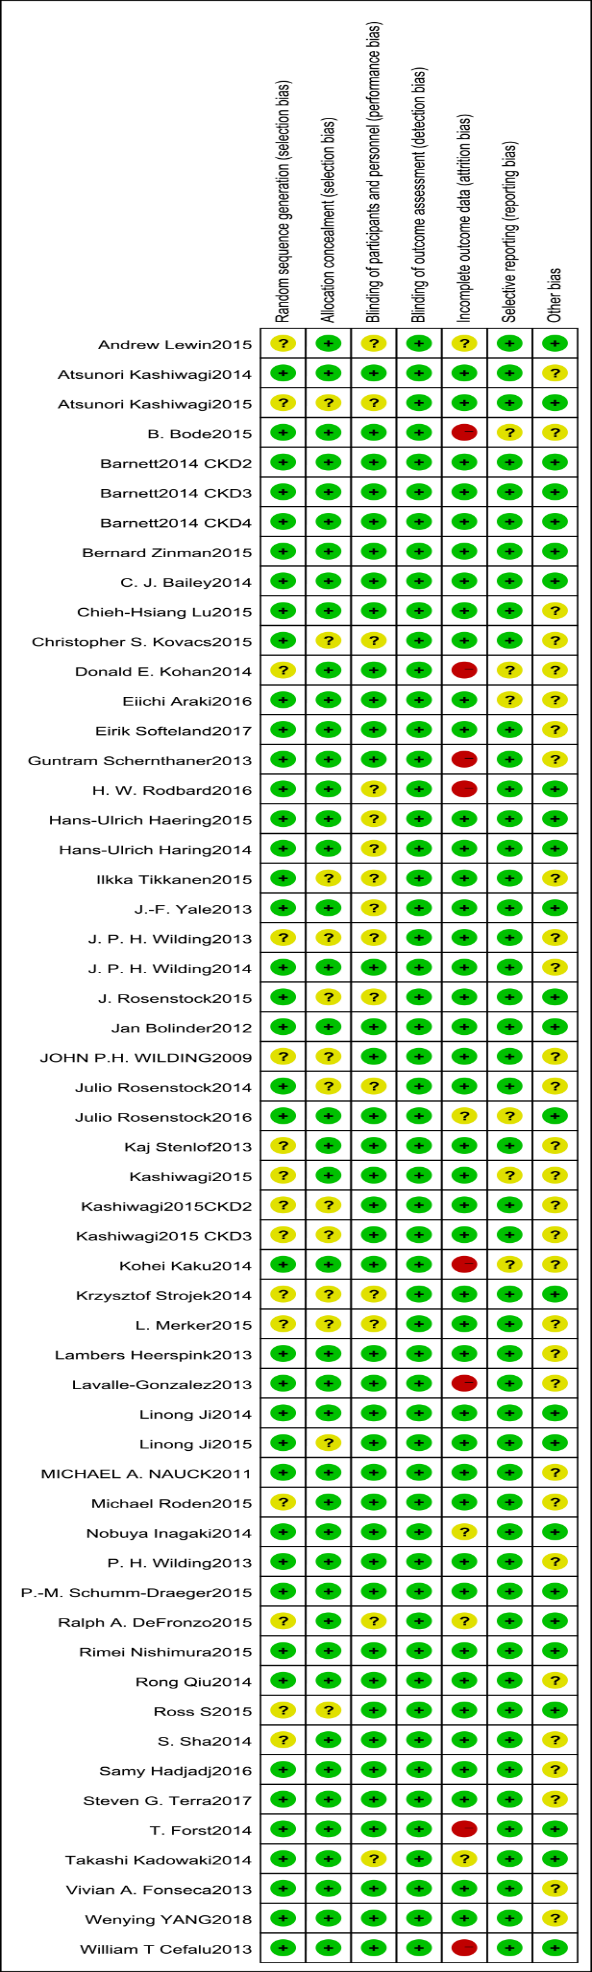
Supplementary Fig. 4**–**The methodological quality of included studies (risk of bias summary)
